# Supplementary material for: Prolactin Regulates Ovine Ovarian Granulosa Cell Apoptosis by Affecting the Expression of MAPK12 Gene
Source: MDPI journal article supplement (doi:10.3390/ijms241210269), 2023-06-17
Supplement: s1 [file s1]

Supplementary Table S2. Experimental design

| Experimental design |                                                                                                                           |
|---------------------|---------------------------------------------------------------------------------------------------------------------------|
| Step 1              | <b>Group A</b> , sponge withdrawal (day 8th)                                                                              |
|                     | <b>Group B</b> , sponge withdrawal (day 11th)                                                                             |
|                     | <b>Group C</b> , FSH (day 7th) + sponge withdrawal (day 8th)                                                              |
|                     | <b>Group D</b> , FSH (day 10th) + sponge withdrawal (day 11th)                                                            |
| Step 2              | <b>P</b> , GCs with HPC (500 ng/mL PRL)                                                                                   |
|                     | <b>P-458</b> (Negative control group), GCs with HPC were transfected by empty plasmid pX458                               |
|                     | <b>P-sg-L</b> , GCs with HPC were transfected by recombinant plasmid of knock down <i>L-PRLR</i>                          |
|                     | <b>P-sg-SL</b> , GCs with HPC were transfected by recombinant plasmid of knock down both <i>L-PRLR</i> and <i>S-PRLR</i>  |
| Step 3              | <b>P</b> , GCs with HPC                                                                                                   |
|                     | <b>P-10</b> (Negative control group), HPC were infected by lentiviruses with empty vectors pGWL10-new of overexpression   |
|                     | <b>P-10-L</b> , GCs with HPC were infected by lentiviruses carrying overexpressed sequences of <i>L-PRLR</i>              |
|                     | <b>P-10-S</b> , GCs with HPC were infected by lentiviruses carrying overexpressed sequences of <i>S-PRLR</i>              |
| Step 3              | <b>P</b> , GCs with HPC                                                                                                   |
|                     | <b>P-G</b> (Negative control group), GCs with HPC were infected by lentiviruses with empty vectors pGWL33 of interference |
|                     | <b>P-SH</b> , GCs with HPC were infected by lentiviruses carrying interference sequence of <i>MAPK12</i>                  |
|                     | <b>P</b> , GCs with HPC                                                                                                   |
| Step 3              | <b>P-10</b> , (Negative control group), HPC were infected by lentiviruses with empty vectors pGWL10-new of overexpression |
|                     | <b>P-10-M</b> , GCs with HPC were infected by lentiviruses carrying overexpressed sequences of <i>MAPK12</i>              |
