# Supplementary material for: Prolactin Regulates Ovine Ovarian Granulosa Cell Apoptosis by Affecting the Expression of MAPK12 Gene
Source: MDPI journal article supplement (doi:10.3390/ijms241210269), 2023-06-17
Supplement: s1 [file s1]

***L-PRLR:***GCTAGCGCCACCATGAAGGAAAATGCAGCATCCAGAGTGCTTTTCAT  
TCTGCTACTTTTTCTCTTCGCCAGCCTTCTGAATGGACAGTCACCTCCTGAAAA  
ACCCAAGCTTATTAAATGTCGGTCTCCTGGAAAGGAAACGTTACCTGCTGGT  
GGGAGCCCGGGGCAGATGGAGGACTTCCTACCAATTACACACTGACTTACCGC  
AAGGAAGGAGAAACACTCATCCATGAATGTCCAGACTACAAAACCGGGGGCC  
CCAACCTCCTGCTACTTTAGCAAGAAGTACACCTCCATATGGAAGATGTATGTCA  
TCACAGTAAGCGCCATCAACCAGATGGGAATCAGTTCCTCAGATCCACTTTAT  
GTGGACGTGACTTACATAGTTGAACCAGAGCCTCCTGTGAACCTGACTTTGGA  
ATTAACATCCAGAAGATAGAAAACCATATCTATGGATAAAATGGTCTCCACC  
CACCTGACTGATGTAAAATCTGGTTGGTTCAGTATCCAGTACGAAATTCGATT  
AAAACCTGAGAAAGCAACTGACTGGGAGACTCATTTTGCTCCAAAGCTGACT  
CAGCTTAAGATTTTCAACTTATATCCAGGACAGAAATACCTTGTGCAGATTCGA  
TGCAAGCCAGACCATGGATACTGGAGTGAGTGGAGCCCAGAGAGCTTCATCC  
AGATACCTAATGACTTCCCAGTGAAGGATACAAGCATGTGGATCTTTGTGGGC  
GTCCTTTCTGCTGTCATCTGTTTGATTATGGTCTGGGCAGTGGCTTTGAAGGGC  
TATAGCATGGTGACCTGCATCCTCCCACCAGTTCAGGGCCAAAAATAAAAGG  
ATTTGATATTCATCTGCTGGAGAAGGGCAAGTCCGAAGAACTTCTGAGAGCTC  
TGGAAGCCAAGACTTCCTTCCCCTTCTGACTGCGAGGATTTGCTGATGGAA  
TTCATAGAGGTAGATGACAGTGAGGACCAACACCTGATGCCACACCCCTCCAA  
AGAACACATGGAGCAAGGCGTGAAGCCCATGCACCTGGATCCTGACACTGAC  
TCTGGCCGGGGCAGCTGTGACAGCCCTTCACTCTTGTCTGAAAAGTGTGATGA  
ACCTCAGGCCTATCCCTCCAAGTTCACATTCCAGAGGGCCCTGAGAAGCTGG  
AGGATCCCGAAACAAATCATACATGTCTCCAGGCCCTCAGAGCACAAGTGGG

GAAGGCAAAATCCCCTATTTTCTGGCCAACGGACCCAAATCTTCCACATGGCC  
TTTCCCGCAGCCCCCAGCCTGTACAGCCCCAGATATTCTTACCACAACATTGC  
TGACGTGTGTGAGCTGGCCCTGGGCATGGCAGGCACCACAGCCACTCTGCTG  
GACCAAACAGACCAACATGCCTTTAAACCCTCAAAAACCATTGAGACTGGCG  
GGGAAGGAAAGGCAGCCAAACAGAGCGAGTCAGAAGGCTACAGTTCCGAGC  
CTGACCAAGACATGGCATGGCCACTGCTCCAAGACAAAACCCCCTTGTTCTCT  
GCTAAACCCTTGGAATATGTGGAGATCCACAAGGTCAGCCAAGATGGAGTGCT  
AGCTCTGTTCCCAAAACAAAATGAGAAGGTTGACGCCCCTGAAACCAGCAAG  
GAGTACTCGAAGGTGTCTCGGGTGACGGATAGCAACATCCTGGTGTGATACC  
GGATCTGCAAGCGCAAAACCTGACTCTGTTAGAAGAATCAGCCAAGAAGGCC  
CCGCCAGCCCTGCCATAGTCTAGA

***S-PRLR:***GCTAGCGCCACCATGAAGGAAAATGCAGCATCCAGAGTGCTTTTCAT  
TCTGCTACTTTTTCTCTTCGCCAGCCTTCTGAATGGACAGTCACCTCCTGAAAA  
ACCCAAGCTTATTAAATGTCGGTCTCCTGGAAAGGAAACGTTACCTGCTGGT  
GGGAGCCCGGGGCAGATGGAGGACTTCCTACCAATTACACACTGACTTACCGC  
AAGGAAGGAGAAACACTCATCCATGAATGTCCAGACTACAAAACCGGGGGCC  
CCAACCTCCTGCTACTTTAGCAAGAAGTACACCTCCATATGGAAGATGTATGTCA  
TCACAGTAAGCGCCATCAACCAGATGGGAATCAGTTCCTCAGATCCACTTTAT  
GTGGACGTGACTTACATAGTTGAACCAGAGCCTCCTGTGAACCTGACTTTGGA  
ATTAAAACATCCAGAAGATAGAAAACCATATCTATGGATAAAATGGTCTCCACC  
CACCTGACTGATGTAAAATCTGGTTGGTTCAGTATCCAGTACGAAATTCGATT  
AAAACCTGAGAAAGCAACTGACTGGGAGACTCATTTTGCTCCAAAGCTGACT

CAGCTTAAGATTTTCAACTTATATCCAGGACAGAAATACCTTGTGCAGATTCTGA  
TGCAAGCCAGACCATGGATACTGGAGTGAGTGGAGCCCAGAGAGCTTCATCC  
AGATACCTAATGACTTCCCAGTGAAGGATACAAGCATGTGGATCTTTGTGGGC  
GTCCTTTCTGCTGTCATCTGTTTGATTATGGTCTGGGCAGTGGCTTTGAAGGGC  
TATAGCATGGTGACCTGCATCCTCCCACCAGTTCCAGGGCCAAAAATAAAAGG  
ATTTGATATTCATCTGCTGGAGATATCACAGCCTTCTCGCCTTGTGTCTGTGTTT  
TAATCTAGA

**MAPK12:**GCTAGCGCCACCATGAGCTCCCCGTCGCCCCGCCGCAAGGGCTTTTA  
TCGCCAGGAGGTGACCAAGACGGCCTGGGAGGTGCGCGTCGTGTACCAGGAT  
CTGCAGCCCGTGGGCTCCGGCGCCTACGGCGCCGTGTGCTCGGCGGTGGACA  
GCCGCACGGGCGCCAAGGTGGCCATCAAGAAGCTGTACCGGCCCTTCCAGTC  
CGAGCTGTTCCGCAAGCGCGCCTACCGCGAGCTGCGCCTGCTGAAGCACATG  
CGCCACGAGAACGTGATTGGGCTGCTGGACGTGTTACGCCCCGATGAGACAC  
TGGATGACTTCACGGACTTCTACCTGGTGATGCCGTTTCATGGGCACCGACCTG  
GGAAAGCTCATGAAGCACGAGAAGCTGAGCGAAGACCGGGTGCAGTTCCTC  
GTCTACCAGACGCTTAAGGGGCTGAAGTACATCCACGCTGCTGGCGTCATCCA  
TAGGGACTTGAAGCCCAGCAACCTGGCTGTGAACGAGGACTGTGAGCTGAAG  
ATTCTGGACTTCGGCCTGGCCCCGGCAGGCAGACAGCGAGATGACCGGCTACG  
TGGTGACCCGGTGGTACCGCGCGCCCCGAGGTCATCTTGAAGTGGATGCGCTAC  
ACGCAGACGGTGGACATCTGGTCCGTGGGCTGCATCATGGCTGAGATGATCAC  
AGGGAAGACGCTCTTCAAAGGCAACGACCACCTGGACCAGCTGAAGGAGAT  
CATGAAGGTGACAGGGACGCCTCCCGCGGAGTTTGTGCAGAGGCTGCAAAGT

GATGAGGCCAAGA ACTACATGAAGGGCCTCCCTGAGCTGGAGAAGAAGGATT  
TTGCCTCCGTCCTGACCAACGCGAGCCCCCTGGCCGTGAGCCTCCTGGAGAA  
AATGCTGGTGCTGGACGCAGAGCAGCGGGTGACGGCGGCCGAGGCACTGGC  
CCATCCCTACTTCGAGTCACTGCACGACACGGAGGACGAGCCCCAGGCCAG  
AAGTACGATGAGTCCTTTGACGACGTGGACCGCACGCTGGATGAGTGGAAGC  
GTGTCACATATAAAGAGGTGCTCAGCTTCAAGCCTCCCCGGCAGCTGGGGGCC  
AAGGCCTCCAAGGAGACAGCCTTGTGATCTAGA
