# Supplementary material for: Prolactin Regulates Ovine Ovarian Granulosa Cell Apoptosis by Affecting the Expression of MAPK12 Gene
Source: MDPI journal article supplement (doi:10.3390/ijms241210269), 2023-06-17
Supplement: s1 [file s1]

Supplementary Table S1. Ingredients and chemical composition of the diet for the steers as rumen fluid donor (% DM)

| Items              | Contents |
|--------------------|----------|
| Peanut seedling    | 14.5     |
| Corn Silage        | 53.2     |
| Corn               | 9.1      |
| Bran               | 6.9      |
| Soybean meal       | 8.5      |
| Com DDGS           | 4.8      |
| Stone powder       | 0.9      |
| NaCl               | 0.6      |
| NaHCO <sub>3</sub> | 1.0      |
| Premix             | 0.5      |
| Nutrients          |          |
| CP                 | 13.25    |
| NDF                | 24.62    |
| ADF                | 23.61    |
| EE                 | 7.27     |
| Ca                 | 1.30     |
| P                  | 0.7      |
| ME (MJ/kg)         | 9.68     |

Note: The premix provided the following per kg of the diet: VA 11500 IU, VD25000 IU, VE 600 mg, nicotinic acid 300 mg, Zn (as zinc sulfate) 2.8 g, Cu (as copper sulfate) 0.5 g, Se (as sodium selenite) 6.5 mg, Fe (as ferrous sulfate) 1.0 g, Mn (as manganese sulfate) 110 mg.

CP = crude protein; ADF = acid detergent fiber; NDF = neutral detergent fiber.
