# Supplementary material for: Prolactin Regulates Ovine Ovarian Granulosa Cell Apoptosis by Affecting the Expression of MAPK12 Gene
Source: Int J Mol Sci. 2023 Jun 17;24(12):10269. doi: 10.3390/ijms241210269 (PMC10298867; doi:10.3390/ijms241210269)
Supplement: Supplementary file 1 [file ijms-24-10269-s001.zip]

Archive with 4 entries (4 files):
- Figure S1.pdf
- Supp Table S1.pdf
- Supp Table S2.pdf
- Supplemental File S1.pdf
